# Supplementary material for: Coenzyme Q10 attenuates high-fat diet-induced non-alcoholic fatty liver disease through activation of the AMPK pathway
Source: Royal Society of Chemistry journal article supplement (doi:10.1039/c8fo01236a), 2019-01-01
Supplement: c8fo01236a1.pdf [file c8fo01236a1.pdf]

### Supplementary Table1

Compositions of the standard low-fat diet, the high-fat diet (HFD).

| Ingredients (gm%)            | Standard diet (Control) | HFD   |
|------------------------------|-------------------------|-------|
| Casein                       | 18.96                   | 25.84 |
| L-Cystine                    | 0.28                    | 0.39  |
| Corn starch                  | 29.86                   | 0     |
| Maltodextrin                 | 3.32                    | 16.15 |
| Sucrose                      | 33.17                   | 8.89  |
| Cellulose                    | 4.74                    | 6.46  |
| Soybean Oil                  | 2.37                    | 3.23  |
| Lard                         | 1.9                     | 31.66 |
| Mineral Mix                  | 4.24                    | 5.81  |
| Vitamin Mix                  | 0.95                    | 1.29  |
| Choline tartrate             | 0.19                    | 0.26  |
| energy(kcal/g)               | 3.85                    | 5.24  |
| Energy from fat (%)          | 10%                     | 60%   |
| Energy from carbohydrate (%) | 70%                     | 20%   |
| Energy from protein (%)      | 20%                     | 20%   |

**Supplementary Table2**

---

|        | Species | Forward                     | Reverse                     |
|--------|---------|-----------------------------|-----------------------------|
| Fas    | Mouse   | GGAGGTGGTGATAGCCGGT<br>AT   | TGGGTAATCCATAGAGCCCA<br>G   |
| Acc    | Mouse   | CTCCCGATTCATAATTGGGT<br>CTG | TCGACCTTGTTTTACTAGGT<br>GC  |
| Ppara  | Mouse   | TTTCGGCGAACTATTCGGCT<br>G   | GGCATTGTTCGGTTCTTCT<br>T    |
| Cpt-1a | Mouse   | TGGCATCATCACTGGTGTGT<br>T   | GTCTAGGGTCCGATTGATCT<br>TTG |
| Apob   | Mouse   | GCTCAACTCAGGTTACCGTG<br>A   | AGGGTGTACTGGCAAGTTTG<br>GG  |
| Mttp   | Mouse   | ATACAAGCTCACGTACTION<br>CT  | TCTCTGTTGACCCGCATTTTC       |
| IL-1b  | Mouse   | GAAATGCCACCTTTTGACAG<br>TG  | TGGATGCTCTCATCAGGACA<br>G   |
| TNF-a  | Mouse   | CAGGCGGTGCCTATGTCTC         | CGATCACCCCGAAGTTCAGT<br>AG  |
| FAS    | Human   | ACAGCGGGGAATGGGTACT         | GACTGGTACAACGAGCGGA<br>T    |
| ACC    | Human   | ATGTCTGGCTTGCACCTAGT<br>A   | CCCCAAAGCGAGTAACAAA<br>TTCT |
| PPARA  | Human   | TTCGCAATCCATCGGCGAG         | CCACAGGATAAGTCACCGA<br>GG   |
| CPT-1A | Human   | ATCAATCGGACTCTGGAAAC<br>GG  | TCAGGGAGTAGCGCATGGT         |
| APOB   | Human   | TGCTCCACTCACTTTACCGT<br>C   | TAGCGTCCAGTGTGTACTGA<br>C   |
| MTTP   | Human   | ACAAGCTCACGTACTION<br>G     | TCCTCCATAGTAAGGCCACA<br>TC  |

---
